# Supplementary material
Source: Preprints.org preprint supplement (doi:10.20944/preprints202003.0102.v1)

**Supplementary Table 1:** Table showing fold change with P value in AR downstream-regulated genes.

| Gene symbol | Fold change | P value  | Gene symbol | Fold change | P value  |
|-------------|-------------|----------|-------------|-------------|----------|
| ABCC4       | -1.4779     | 0.158456 | ORM1        | 1.839       | 0.007383 |
| ABHD2       | -1.1285     | 0.828411 | ORM2        | 2.0262      | 0.318749 |
| ACSL3       | -1.7475     | 0.031188 | PAK1IP1     | -3.254      | 0.015956 |
| ADAMTS1     | -1.468      | 0.067877 | PGC         | -1.3696     | 0.428019 |
| ALDH1A3     | -1.1699     | 0.657286 | PIAS1       | -1.3618     | 0.391551 |
| APPBP2      | -1.5388     | 0.153091 | PIK3R3      | -2.6605     | 0.017855 |
| AR          | -1.6888     | 0.06232  | PMEPA1      | -2.1143     | 0.030902 |
| CAMKK2      | -1.759      | 0.053974 | PPAP2A      | -1.3249     | 0.199678 |
| CENPN       | -2.1036     | 0.021776 | RAB4A       | -1.3636     | 0.387594 |
| CITED2      | -1.9274     | 0.041855 | REL         | -1.211      | 0.600392 |
| ACKR3       | 2.6822      | 0.062786 | RELA        | -1.3016     | 0.431876 |
| CYP2U1      | -1.6126     | 0.122682 | RHOA        | -2.1077     | 0.042831 |
| DBI         | -1.2703     | 0.025292 | SEC22C      | -1.648      | 0.048733 |
| DHCR24      | -2.1823     | 0.036002 | SGK1        | 1.373       | 0.322701 |
| EAF2        | 1.1818      | 0.144587 | SLC26A2     | -1.5196     | 0.131967 |
| ELK1        | -2.9308     | 0.037614 | SLC45A3     | -4.5619     | 0.002423 |
| ELL2        | -3.251      | 0.003617 | SMS         | -1.3771     | 0.30469  |
| ENDOD1      | -1.3374     | 0.403678 | SNAI2       | 3.32        | 0.00497  |
| ERRFI1      | -1.5812     | 0.377001 | SORD        | -1.5679     | 0.014492 |
| FAM105A     | -1.0251     | 0.941778 | SP1         | -1.9549     | 0.070468 |
| FKBP5       | -4.4312     | 0.001668 | SPDEF       | -2.5759     | 0.012049 |
| FOS         | -1.1142     | 0.897169 | SRF         | -3.0659     | 0.019875 |
| FZD5        | -2.9479     | 0.057798 | STEAP4      | -1.4217     | 0.663406 |
| GUCY1A3     | -3.037      | 0.069962 | STK39       | 1.0655      | 0.700221 |
| HERC3       | -2.6578     | 0.020277 | TIPARP      | -1.427      | 0.342979 |
| HPGD        | -2.0116     | 0.045285 | TMPRSS2     | -2.0577     | 0.043524 |
| IGF1R       | -2.0479     | 0.049184 | TPD52       | -2.6335     | 0.026346 |
| IGFBP5      | 1.0841      | 0.101161 | TRIB1       | -1.4319     | 0.444507 |
| IRS2        | -1.6835     | 0.118206 | TSC22D1     | -2.216      | 0.044714 |
| JUN         | -1.0436     | 0.926472 | TSC22D3     | -1.7487     | 0.114683 |
| KLK2        | -2.8097     | 0.009208 | VAPA        | -1.6904     | 0.169269 |
| KLK3        | -1.9642     | 0.129541 | VIPR1       | -1.6018     | 0.025484 |
| KLK4        | 1.1909      | 0.407188 | WIP1        | 1.3647      | 0.273765 |
| KRT8        | -1.1503     | 0.779502 | ZBTB10      | -1.1935     | 0.584875 |
| LIFR        | -1.5469     | 0.168466 | ZBTB16      | -1.5105     | 0.108269 |
| LRIG1       | -1.5578     | 0.106212 | ZNF189      | -2.0552     | 0.071295 |
| LRRFIP2     | -2.0359     | 0.052622 | ACTB        | -1.5088     | 0.291685 |
| MAF         | -1.1133     | 0.561656 | B2M         | 1.0743      | 0.649051 |
| MAP7D1      | -1.1021     | 0.837968 | GAPDH       | -2.4307     | 0.023495 |
| MME         | -3.3395     | 0.016146 | HPRT1       | -2.651      | 0.005073 |
| MT2A        | -2.4456     | 0.000789 | RPLP0       | 1           | 0        |
| MYC         | -3.6785     | 0.000886 | HGDC        | 1.0841      | 0.101161 |
| NCAPD3      | -4.1731     | 0.010971 | RTC         | 1.053       | 0.649571 |
| NDRG1       | 1.1548      | 0.529154 | RTC         | 1.029       | 0.755263 |
| NFKB1       | -1.5773     | 0.163635 | RTC         | -1.0034     | 0.997412 |
| NFKB2       | -1.0936     | 0.86407  | PPC         | 1.1074      | 0.150436 |
| NFKBIA      | -1.2895     | 0.500925 | PPC         | 1.0029      | 0.93002  |
| NKX3-1      | -2.6587     | 0.026431 | PPC         | 1.0354      | 0.385984 |

Fold changes in the 84 Androgen Receptor Signaling Targets present in the RT<sup>2</sup> profiler PCR array.

# Supplementary Figure 1

## Figure 1B western

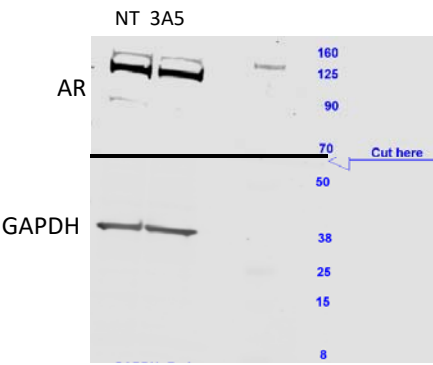

## Figure 1C western

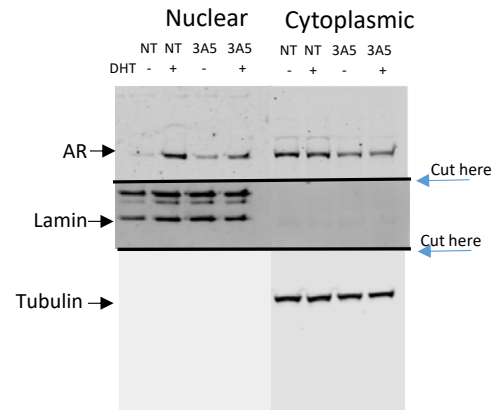

Figure 2B western

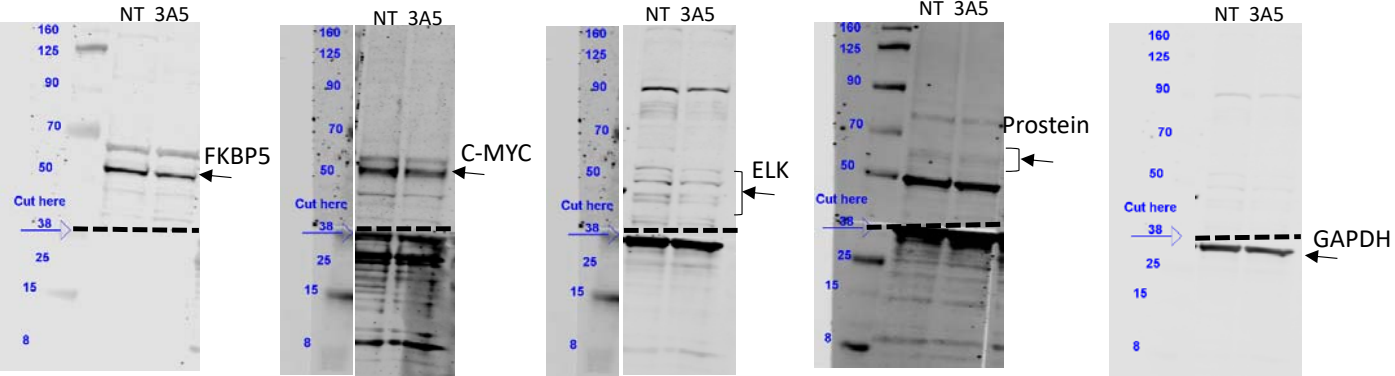

Figure 2C western

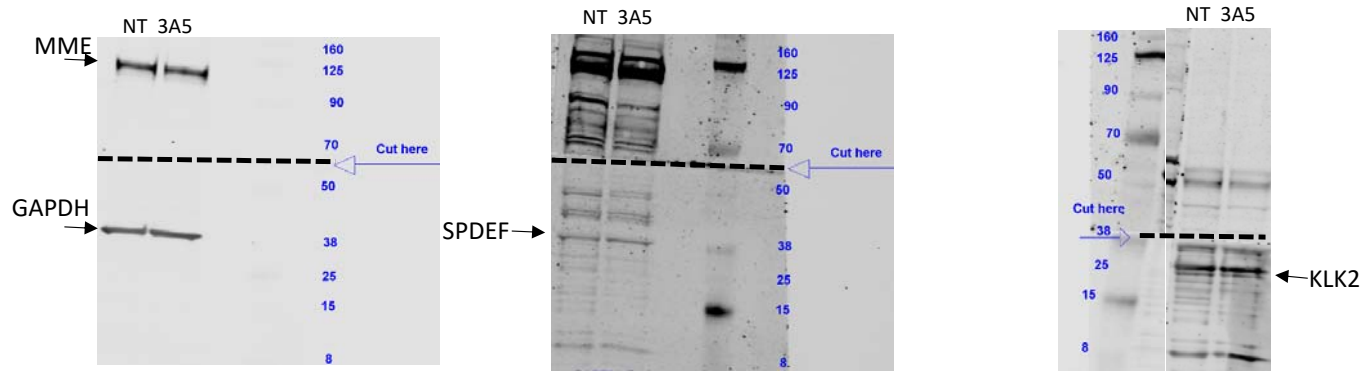

Figure 3A

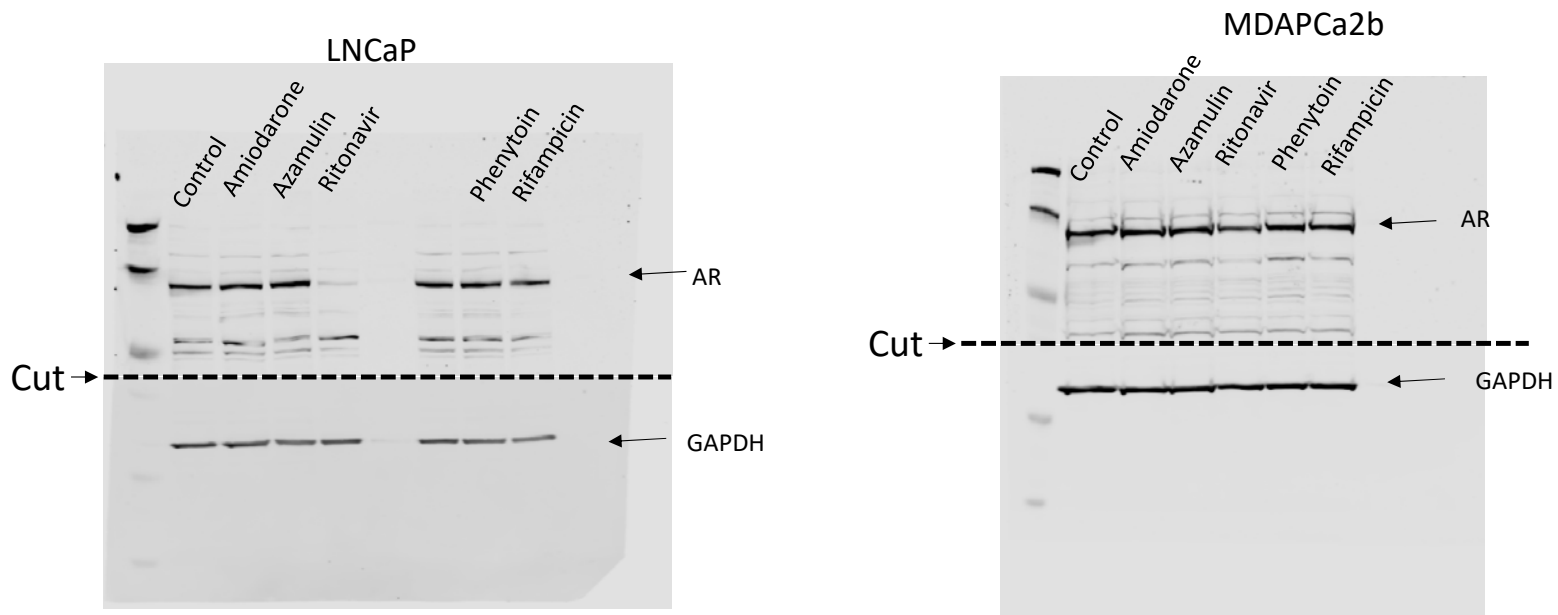

Figure3C1

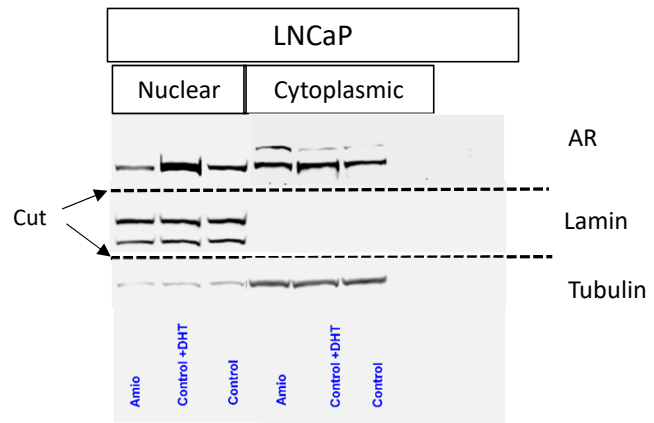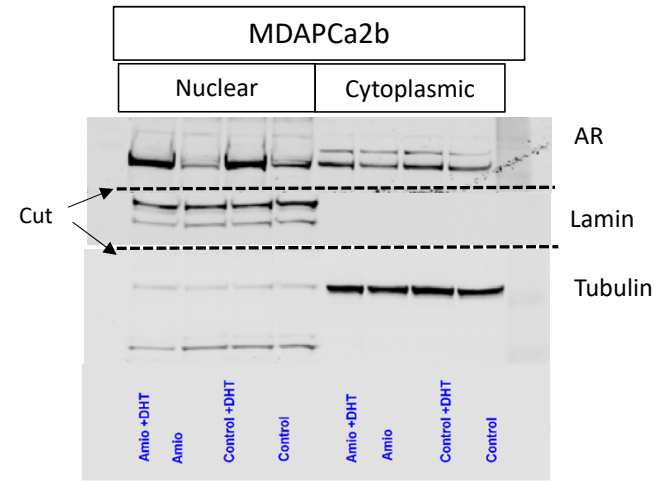

Figure 3C2

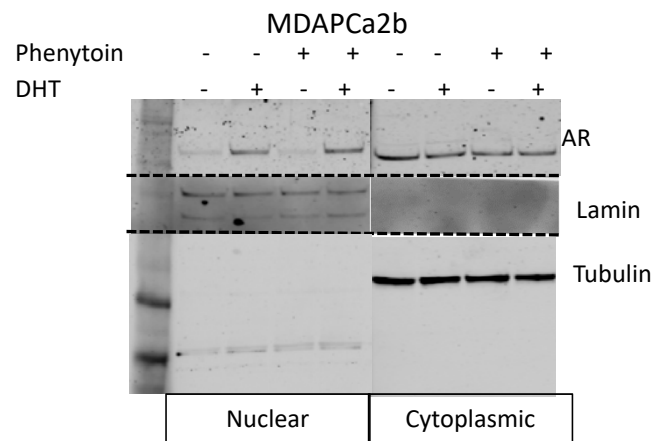

Figure 5

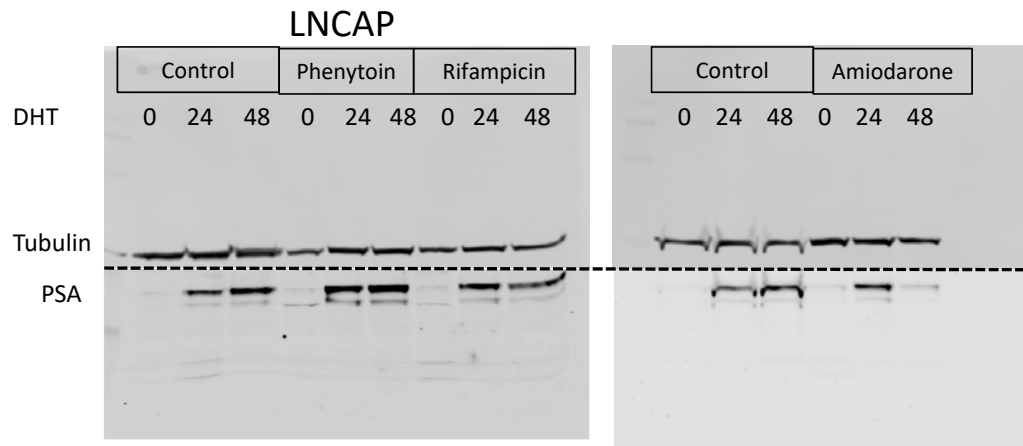

Figure 5

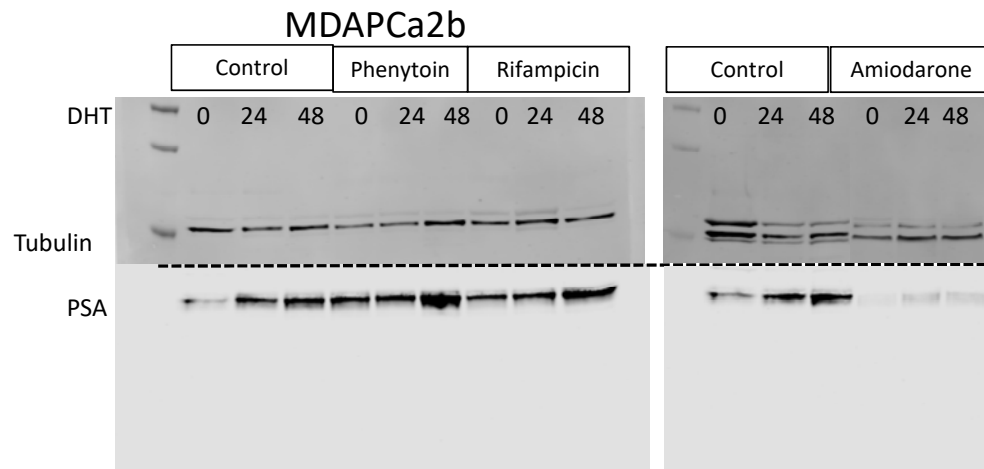

Supplement: Supplementary file 1 [file supplementary]
